# Supplementary material for: Multi-omics pan-cancer analysis reveals an immunological role and prognostic potential of WDR76
Source: Research Square preprint supplement (doi:10.21203/rs.3.rs-7837284/v1), 2025-12-08
Supplement: Supplementary file 1 [file bc7fd964c68f589ab32c908e.xlsx]

## Sheet: String_interacting_genes
Interactive Genes	Target gene	Interactive Genes_string_id
SIRT1	WDR76	9606.ENSP00000212015
RPA3	WDR76	9606.ENSP00000223129
MSH6	WDR76	9606.ENSP00000234420
NCAPH	WDR76	9606.ENSP00000240423
H4C6	WDR76	9606.ENSP00000244537
GINS2	WDR76	9606.ENSP00000253462
RPA1	WDR76	9606.ENSP00000254719
H3-3B	WDR76	9606.ENSP00000254810
CCT7	WDR76	9606.ENSP00000258091
KIF11	WDR76	9606.ENSP00000260731
MCM4	WDR76	9606.ENSP00000262105
DNAJA1	WDR76	9606.ENSP00000369127
RAD23B	WDR76	9606.ENSP00000350708
HSPA4L	WDR76	9606.ENSP00000296464
SPTBN1	WDR76	9606.ENSP00000349259
SPIN2B	WDR76	9606.ENSP00000335008
PRKDC	WDR76	9606.ENSP00000313420
RACK1	WDR76	9606.ENSP00000426909
USP7	WDR76	9606.ENSP00000343535
RFC1	WDR76	9606.ENSP00000371321
SSBP1	WDR76	9606.ENSP00000419665
GAS2L3	WDR76	9606.ENSP00000448955
CHAF1B	WDR76	9606.ENSP00000315700
CCT3	WDR76	9606.ENSP00000295688
CCT5	WDR76	9606.ENSP00000280326
H2AC18	WDR76	9606.ENSP00000358155
H3C13	WDR76	9606.ENSP00000333277
GAN	WDR76	9606.ENSP00000497351
SSRP1	WDR76	9606.ENSP00000278412
TUBB4B	WDR76	9606.ENSP00000341289
DNAJA2	WDR76	9606.ENSP00000314030
MSH3	WDR76	9606.ENSP00000265081
NUMA1	WDR76	9606.ENSP00000377298
CBX1	WDR76	9606.ENSP00000377060
FEN1	WDR76	9606.ENSP00000305480
TCP1	WDR76	9606.ENSP00000317334
CCT2	WDR76	9606.ENSP00000299300
RPA2	WDR76	9606.ENSP00000363017
CUL4B	WDR76	9606.ENSP00000384109
XRCC6	WDR76	9606.ENSP00000352257
XRCC5	WDR76	9606.ENSP00000375978
ATAD2	WDR76	9606.ENSP00000287394
DCAF8	WDR76	9606.ENSP00000357052
XPC	WDR76	9606.ENSP00000285021
CBX3	WDR76	9606.ENSP00000336687
CUL4A	WDR76	9606.ENSP00000364589
THYN1	WDR76	9606.ENSP00000341657
PARP1	WDR76	9606.ENSP00000355759
DDB1	WDR76	9606.ENSP00000301764
HELLS	WDR76	9606.ENSP00000377601

## Sheet: Common_genes
Gene Symbol	Gene ID	PCC
FEN1	ENSG00000168496.3	0.71
KIF11	ENSG00000138160.5	0.69
CHAF1B	ENSG00000159259.7	0.69
ATAD2	ENSG00000156802.12	0.64
MCM4	ENSG00000104738.16	0.63

## Sheet: Combined_list_of_genes
Gene Symbol
SIRT1
RPA3
MSH6
NCAPH
H4C6
GINS2
RPA1
H3-3B
CCT7
KIF11
MCM4
DNAJA1
RAD23B
HSPA4L
SPTBN1
SPIN2B
PRKDC
RACK1
USP7
RFC1
SSBP1
GAS2L3
CHAF1B
CCT3
CCT5
H2AC18
H3C13
GAN
SSRP1
TUBB4B
DNAJA2
MSH3
NUMA1
CBX1
FEN1
TCP1
CCT2
RPA2
CUL4B
XRCC6
XRCC5
ATAD2
DCAF8
XPC
CBX3
CUL4A
THYN1
PARP1
DDB1
HELLS
NUSAP1
MCM6
FANCI
PRC1
KIAA0101
TCF19
PCNA
CLSPN
EZH2
CENPU
CENPK
FEN1
BRIP1
ZNF367
MCM2
LMNB1
CDC7
CHAF1A
DONSON
RRM1
KIF11
NCAPG
CHAF1B
PLK4
ARHGAP11A
TMPO
FAM111B
CCNE2
NCAPG2
DSN1
DNMT1
DTL
ASF1B
PRIM1
ZWINT
KIF23
TYMS
KIFC1
TIPIN
MCM3
POLA1
MCM5
UHRF1
POLA2
KIF4A
RACGAP1
ASPM
PSMC3IP
CCNB2
FBXO5
DHFR
CKAP2L
KIF2C
RFC5
ZWILCH
RBL1
SGOL2
DNAJC9
USP1
OIP5
ATAD2
LRR1
NDC80
TIMELESS
CEP78
KIF15
SKA1
E2F1
CHEK1
POLE2
CENPI
BRCA1
MCM4
CENPL
SMC2
CASC5
DUT
CENPE
HMGB2
SGOL1
RRM2
PHF19
GINS1
CDK1
KIF14
MKI67
CDT1
DEPDC1
BUB1B
BARD1
GTSE1
H2AFV
CDCA5
CENPH
HAUS2
BUB1
KIF18B
NEMP1
RFC2
TOPBP1

## Sheet: GEPIA_100_similar_genes
Gene Symbol	Gene ID	PCC
NUSAP1	ENSG00000137804.12	0.81
MCM6	ENSG00000076003.4	0.76
FANCI	ENSG00000140525.17	0.75
PRC1	ENSG00000198901.13	0.74
KIAA0101	ENSG00000166803.10	0.73
TCF19	ENSG00000137310.11	0.72
PCNA	ENSG00000132646.10	0.72
CLSPN	ENSG00000092853.13	0.72
EZH2	ENSG00000106462.10	0.72
CENPU	ENSG00000151725.11	0.72
CENPK	ENSG00000123219.12	0.72
FEN1	ENSG00000168496.3	0.71
BRIP1	ENSG00000136492.8	0.71
ZNF367	ENSG00000165244.6	0.71
MCM2	ENSG00000073111.13	0.71
LMNB1	ENSG00000113368.11	0.7
CDC7	ENSG00000097046.12	0.7
CHAF1A	ENSG00000167670.15	0.7
DONSON	ENSG00000159147.17	0.7
RRM1	ENSG00000167325.14	0.69
KIF11	ENSG00000138160.5	0.69
NCAPG	ENSG00000109805.9	0.69
CHAF1B	ENSG00000159259.7	0.69
PLK4	ENSG00000142731.10	0.69
ARHGAP11A	ENSG00000198826.10	0.69
TMPO	ENSG00000120802.13	0.69
FAM111B	ENSG00000189057.10	0.69
CCNE2	ENSG00000175305.16	0.68
NCAPG2	ENSG00000146918.19	0.68
DSN1	ENSG00000149636.15	0.68
DNMT1	ENSG00000130816.14	0.68
DTL	ENSG00000143476.17	0.68
ASF1B	ENSG00000105011.8	0.67
PRIM1	ENSG00000198056.13	0.67
ZWINT	ENSG00000122952.16	0.67
KIF23	ENSG00000137807.13	0.67
TYMS	ENSG00000176890.15	0.66
KIFC1	ENSG00000237649.7	0.66
TIPIN	ENSG00000075131.9	0.66
MCM3	ENSG00000112118.17	0.66
POLA1	ENSG00000101868.10	0.66
MCM5	ENSG00000100297.15	0.66
UHRF1	ENSG00000276043.4	0.66
POLA2	ENSG00000014138.8	0.66
KIF4A	ENSG00000090889.11	0.66
RACGAP1	ENSG00000161800.12	0.66
ASPM	ENSG00000066279.16	0.65
PSMC3IP	ENSG00000131470.14	0.65
CCNB2	ENSG00000157456.7	0.65
FBXO5	ENSG00000112029.9	0.65
DHFR	ENSG00000228716.6	0.65
CKAP2L	ENSG00000169607.12	0.65
KIF2C	ENSG00000142945.12	0.65
RFC5	ENSG00000111445.13	0.65
ZWILCH	ENSG00000174442.11	0.65
RBL1	ENSG00000080839.11	0.65
SGOL2	ENSG00000163535.17	0.65
DNAJC9	ENSG00000213551.4	0.65
USP1	ENSG00000162607.12	0.64
OIP5	ENSG00000104147.8	0.64
ATAD2	ENSG00000156802.12	0.64
LRR1	ENSG00000165501.16	0.64
NDC80	ENSG00000080986.12	0.64
TIMELESS	ENSG00000111602.11	0.64
CEP78	ENSG00000148019.12	0.64
KIF15	ENSG00000163808.16	0.64
SKA1	ENSG00000154839.9	0.63
E2F1	ENSG00000101412.12	0.63
CHEK1	ENSG00000149554.12	0.63
POLE2	ENSG00000100479.12	0.63
CENPI	ENSG00000102384.13	0.63
BRCA1	ENSG00000012048.19	0.63
MCM4	ENSG00000104738.16	0.63
CENPL	ENSG00000120334.15	0.63
SMC2	ENSG00000136824.18	0.63
CASC5	ENSG00000137812.19	0.63
DUT	ENSG00000128951.13	0.63
CENPE	ENSG00000138778.11	0.63
HMGB2	ENSG00000164104.11	0.63
SGOL1	ENSG00000129810.14	0.63
RRM2	ENSG00000171848.13	0.63
PHF19	ENSG00000119403.13	0.62
GINS1	ENSG00000101003.9	0.62
CDK1	ENSG00000170312.15	0.62
KIF14	ENSG00000118193.11	0.62
MKI67	ENSG00000148773.12	0.62
CDT1	ENSG00000167513.8	0.62
DEPDC1	ENSG00000024526.16	0.62
BUB1B	ENSG00000156970.12	0.62
BARD1	ENSG00000138376.10	0.62
GTSE1	ENSG00000075218.18	0.62
H2AFV	ENSG00000105968.18	0.62
CDCA5	ENSG00000146670.9	0.62
CENPH	ENSG00000153044.9	0.61
HAUS2	ENSG00000137814.9	0.61
BUB1	ENSG00000169679.14	0.61
KIF18B	ENSG00000186185.13	0.61
NEMP1	ENSG00000166881.9	0.61
RFC2	ENSG00000049541.10	0.61
TOPBP1	ENSG00000163781.12	0.61
