# Supplementary material for: Multi-omics pan-cancer analysis reveals an immunological role and prognostic potential of WDR76
Source: Research Square preprint supplement (doi:10.21203/rs.3.rs-7837284/v1), 2025-12-08
Supplement: Supplementary file 2 [file fa81160199c36ca7ad77ad96.docx]

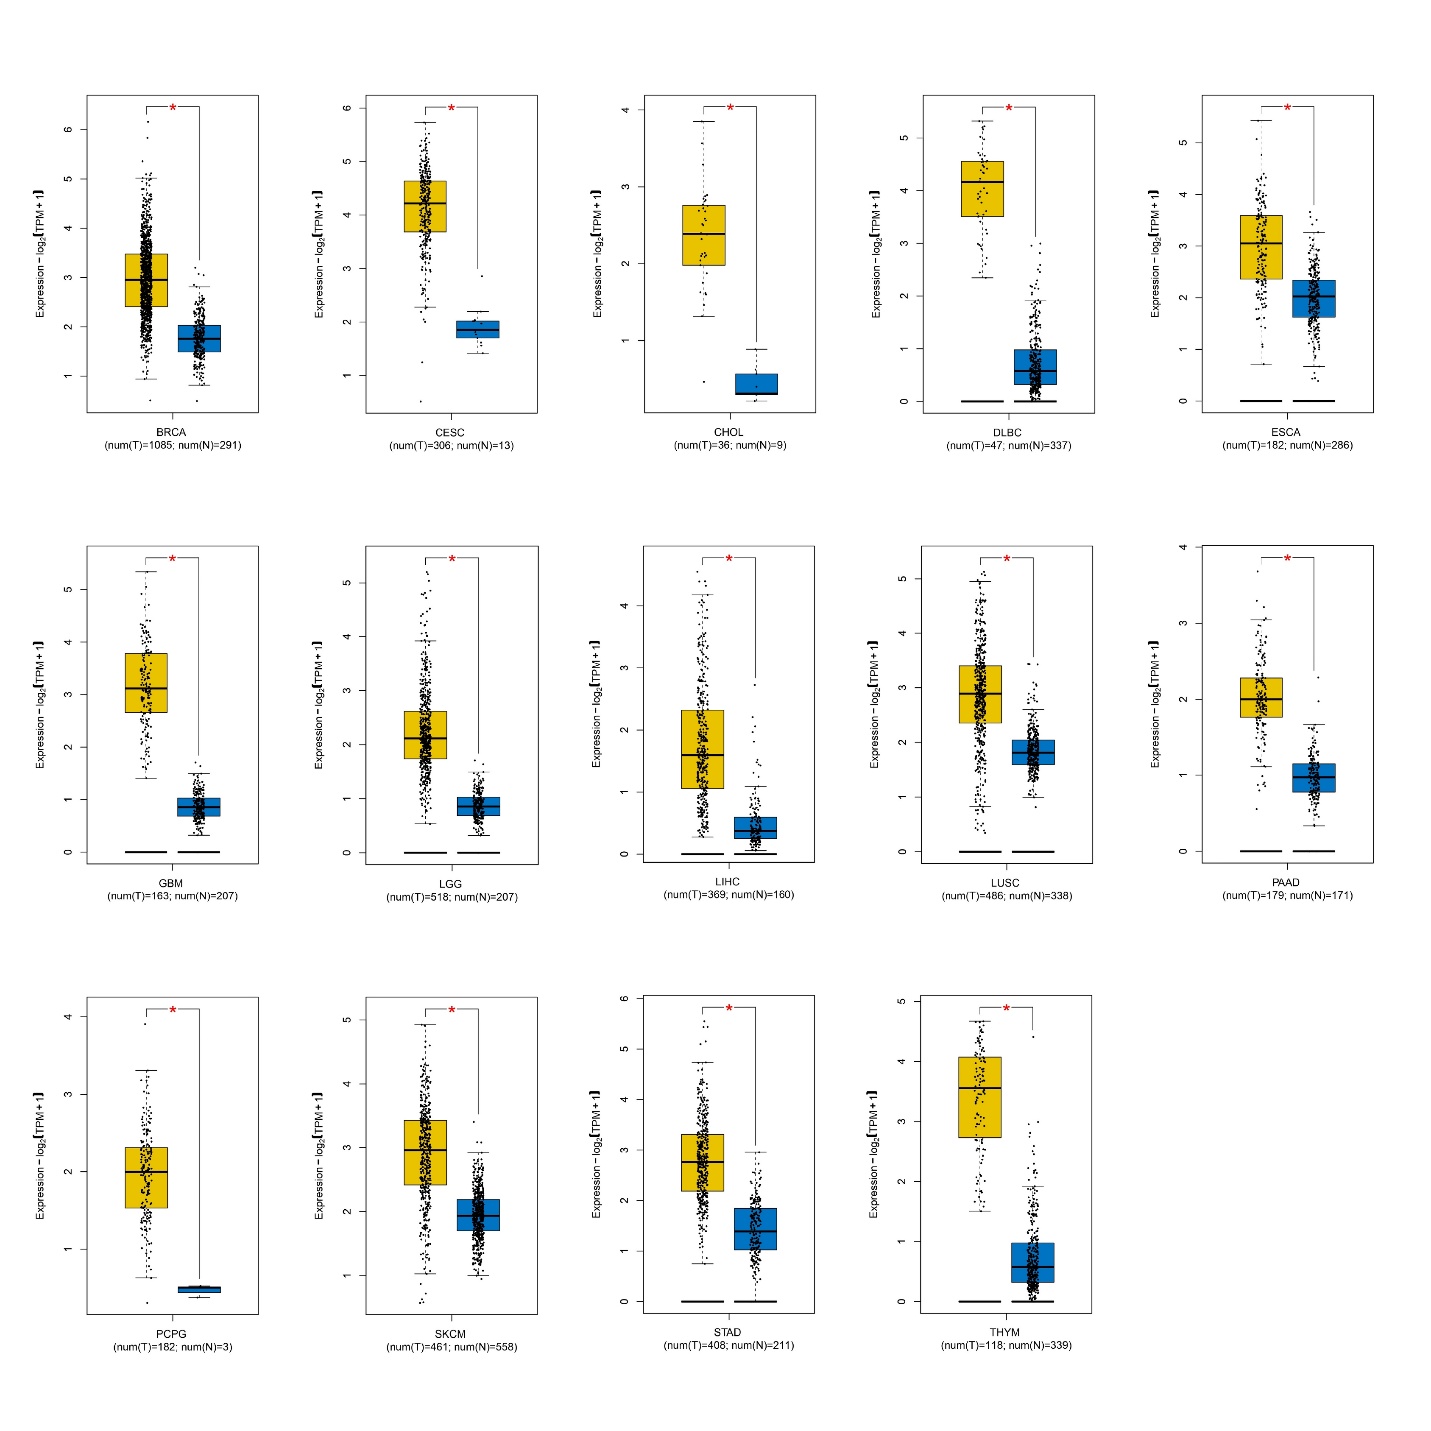


**Fig. 1** Differential expression analysis by GEPIA2. The yellow box plots indicate tumors and blue boxes indicate correspondent normal tissues. There is significant higher expression of WDR76 in BRCA, CESC, CHOL, DLBC, ESCA, GBM, LGG, LIHC, LUSC, PAAD, PCPG, SKCM, STAD, and THYM.


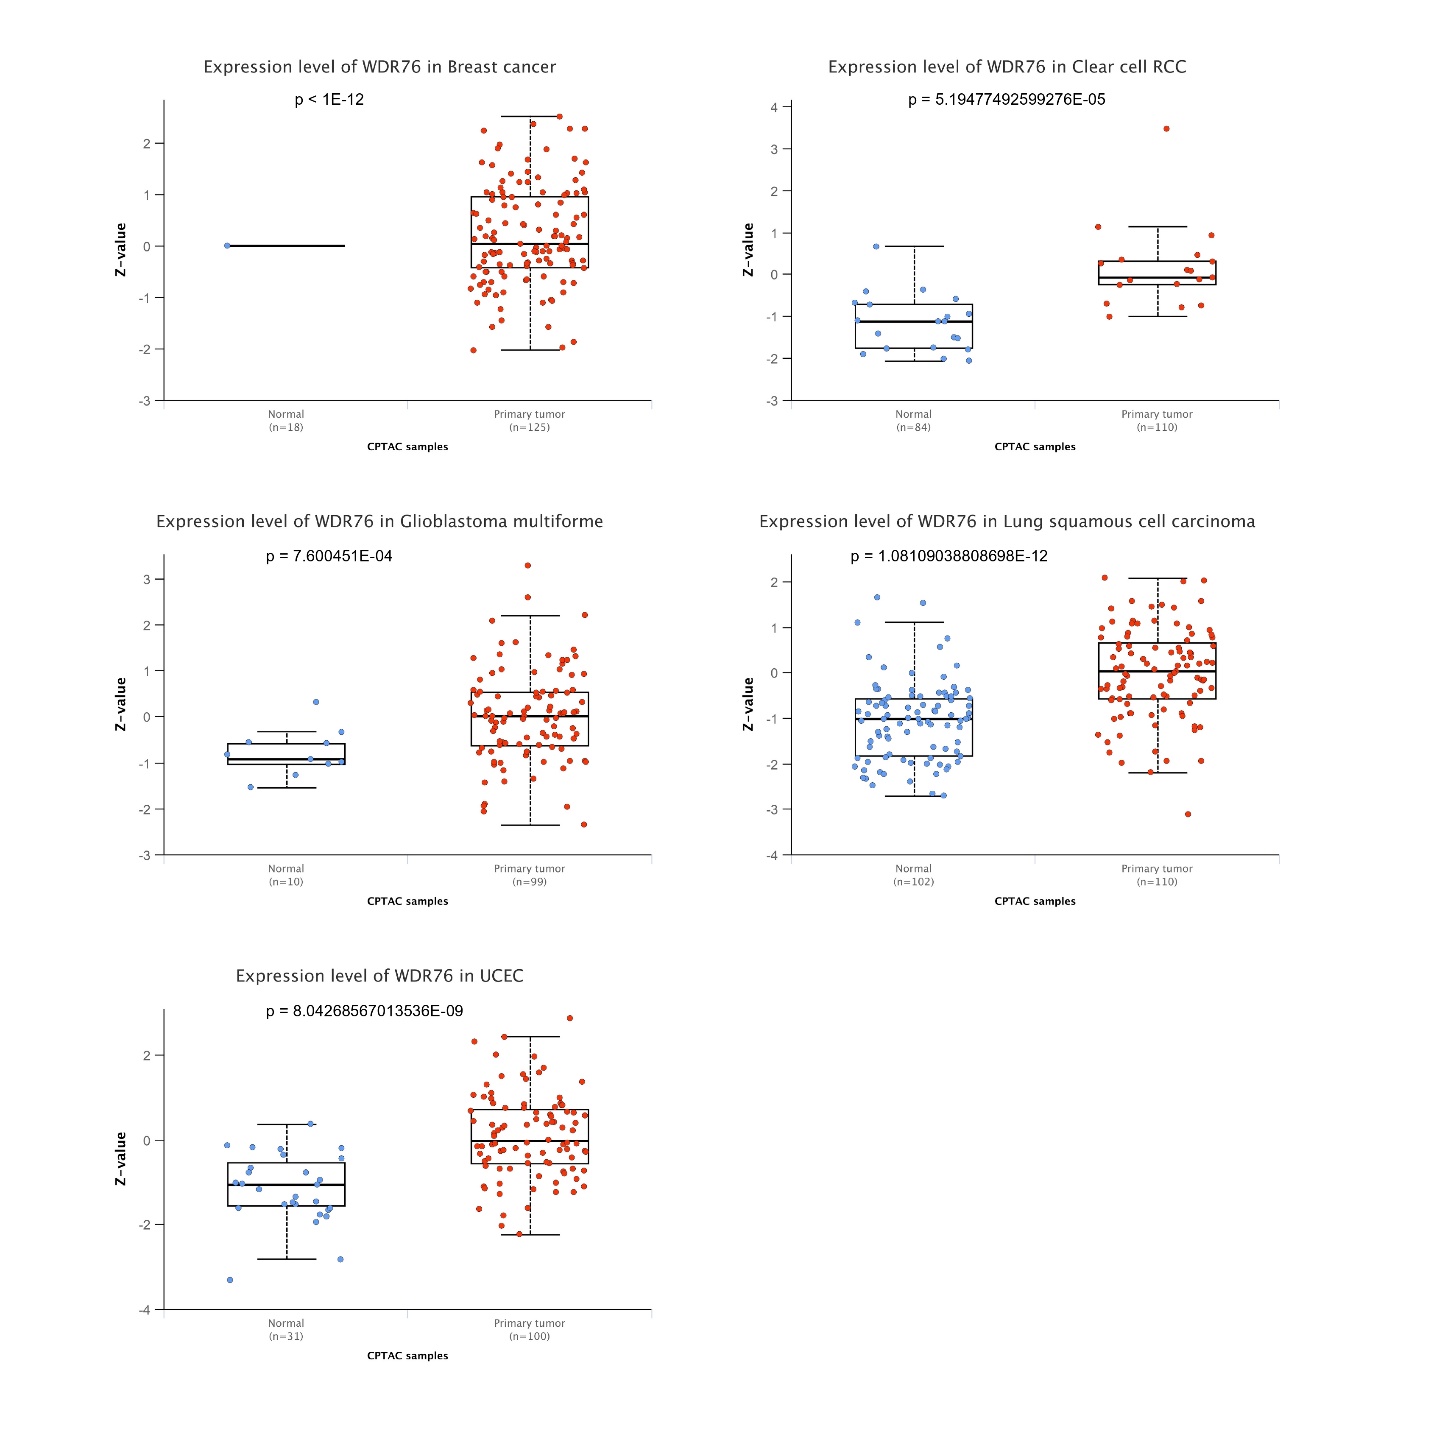


**Fig. 2** Proteomic expression analysis of WDR76 in breast cancer, clear cell RCC, Glioblastoma multiforme, lung squamous cell Carcinoma, and uterine corpus endometrial Carcinoma (UCEC).

**Table 1:** The acronyms and full form of TCGA tumor types.

| **Acronym** | **Full form** |
| --- | --- |
| ACC | Adrenocortical Carcinoma |
| BLCA | Bladder Urothelial Carcinoma |
| BRCA | Breast Invasive Carcinoma |
| CESC | Cervical Squamous Cell Carcinoma and Endocervical Adenocarcinoma |
| CHOL | Cholangiocarcinoma |
| COAD | Colon Adenocarcinoma |
| DLBC | Lymphoid Neoplasm Diffuse Large B-cell Lymphoma |
| ESCA | Esophageal Carcinoma |
| GBM | Glioblastoma Multiforme |
| HNSC | Head and Neck Squamous Cell Carcinoma |
| KICH | Kidney Chromophobe |
| KIRC | Kidney Renal Clear Cell Carcinoma |
| KIRP | Kidney Renal Papillary Cell Carcinoma |
| LAML | Acute Myeloid Leukemia |
| LGG | Brain Lower Grade Glioma |
| LIHC | Liver Hepatocellular Carcinoma |
| LUAD | Lung Adenocarcinoma |
| LUSC | Lung squamous cell Carcinoma |
| MESO | Mesothelioma |
| OV | Ovarian serous Cystadenocarcinoma |
| PAAD | Pancreatic Adenocarcinoma |
| PCPG | Pheochromocytoma and Paraganglioma |
| PRAD | Prostate Adenocarcinoma |
| READ | Rectum Adenocarcinoma |
| SARC | Sarcoma |
| SKCM | Skin Cutaneous Melanoma |
| STAD | Stomach Adenocarcinoma |
| TGCT | Testicular Germ Cell Tumors |
| THCA | Thyroid Carcinoma |
| THYM | Thymoma |
| UCS | Uterine Carcinosarcoma |
| UCEC | Uterine Corpus Endometrial Carcinoma |
| UCS | Uterine Carcinosarcoma |
| UVM | Uveal Melanoma |
